# Supplementary material
Source: PubMed Central journal article supplement (PMC3108184)

Table 1S. Correlation of clinicopathological variables with survivin-2B overexpression in invasive ovarian cancer patients

| Variable      | Survivin overexpression |              | p value |
|---------------|-------------------------|--------------|---------|
|               | Yes<br>(n=28)           | No<br>(n=89) |         |
| Stage         |                         |              |         |
| Low           | 4                       | 4            | .07     |
| High          | 24                      | 85           |         |
| Histology     |                         |              |         |
| Serous        | 18                      | 69           | .16     |
| Other         | 10                      | 20           |         |
| Grade         |                         |              |         |
| Low           | 2                       | 3            | .39     |
| High          | 26                      | 86           |         |
| Ascites       |                         |              |         |
| No            | 12                      | 32           | .51     |
| Yes           | 16                      | 57           |         |
| Cytoreduction |                         |              |         |
| Optimal       | 21                      | 58           | .33     |
| Suboptimal    | 7                       | 31           |         |

# Supplementary Figures

1S

A

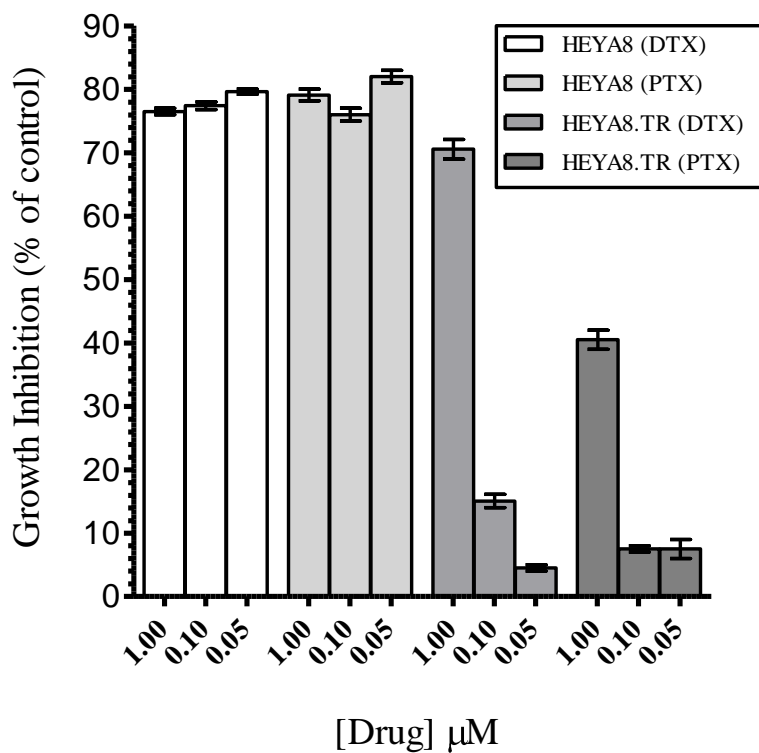

B

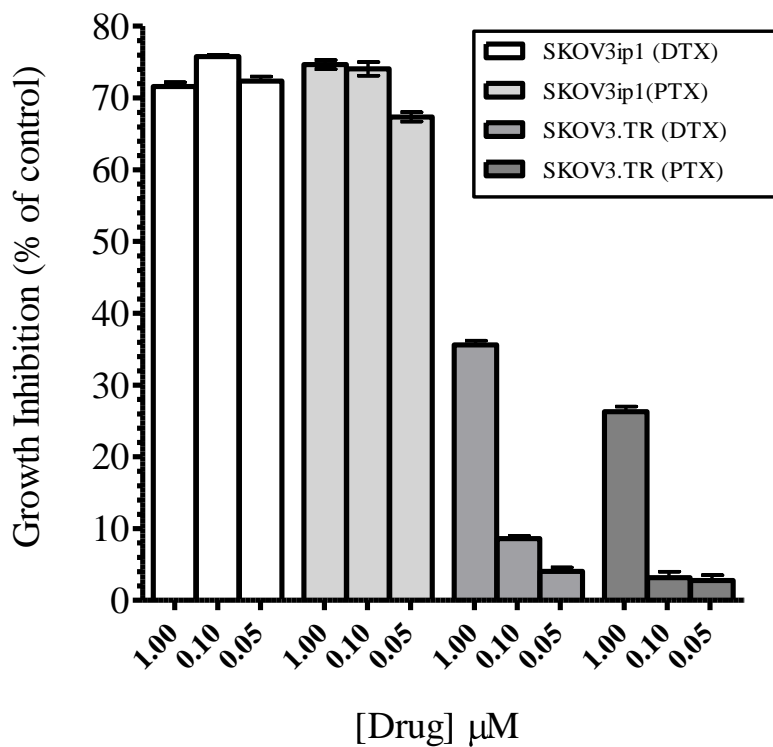

A

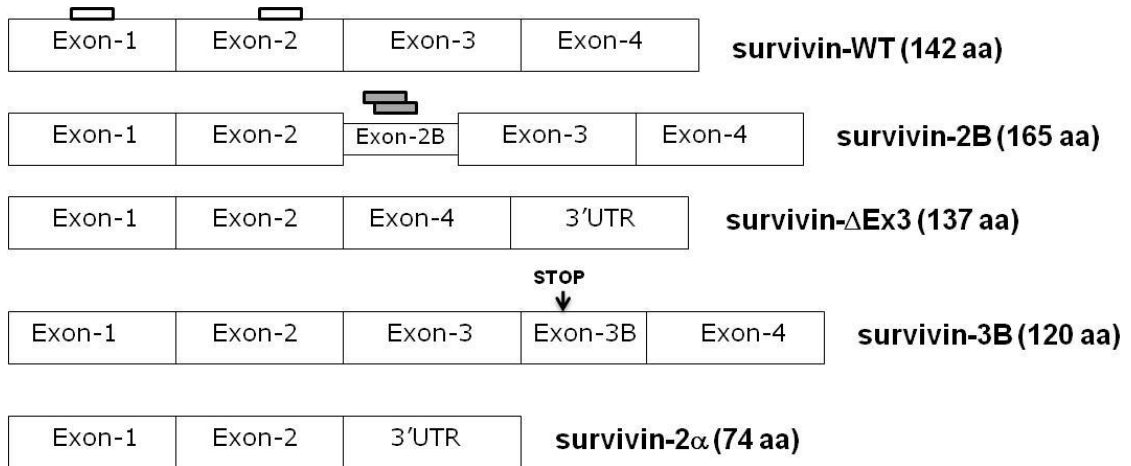

B

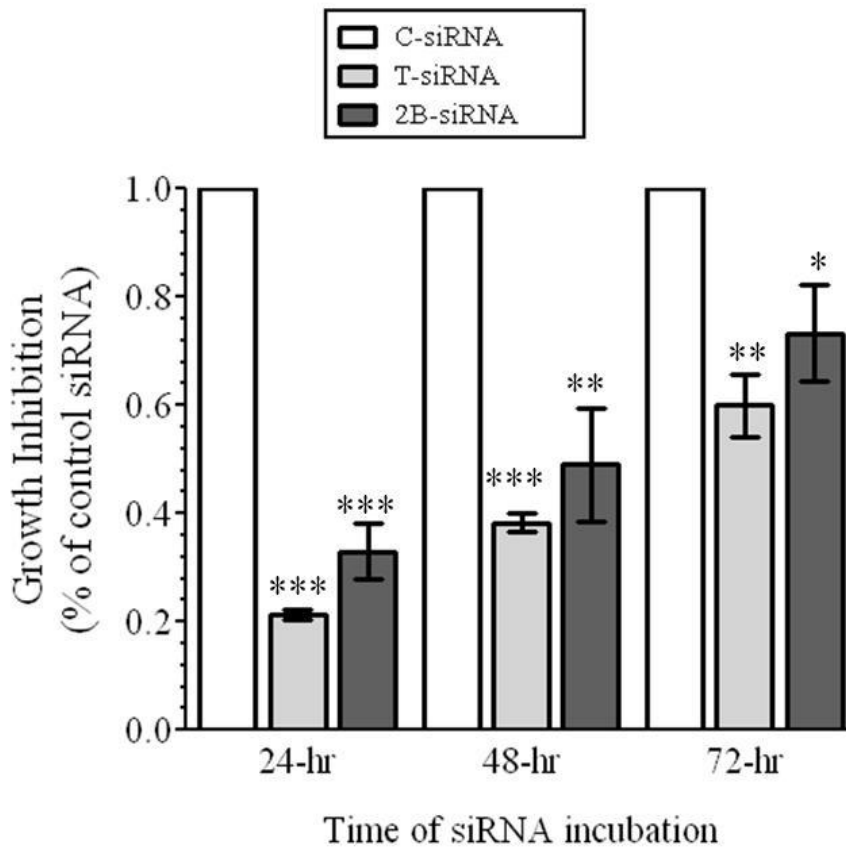

A

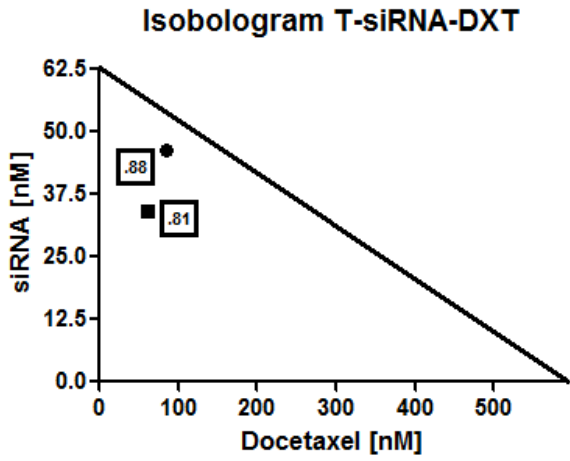

B

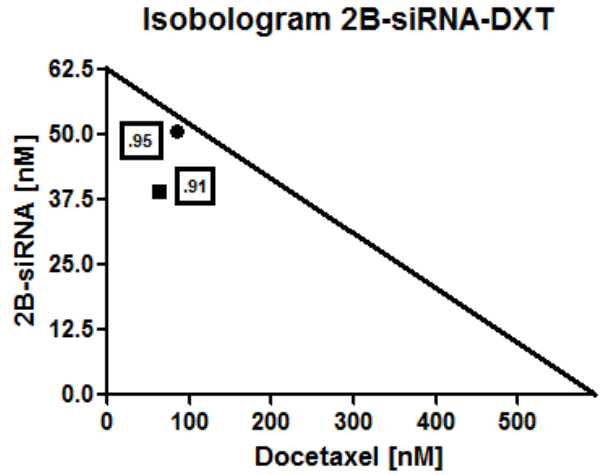

C

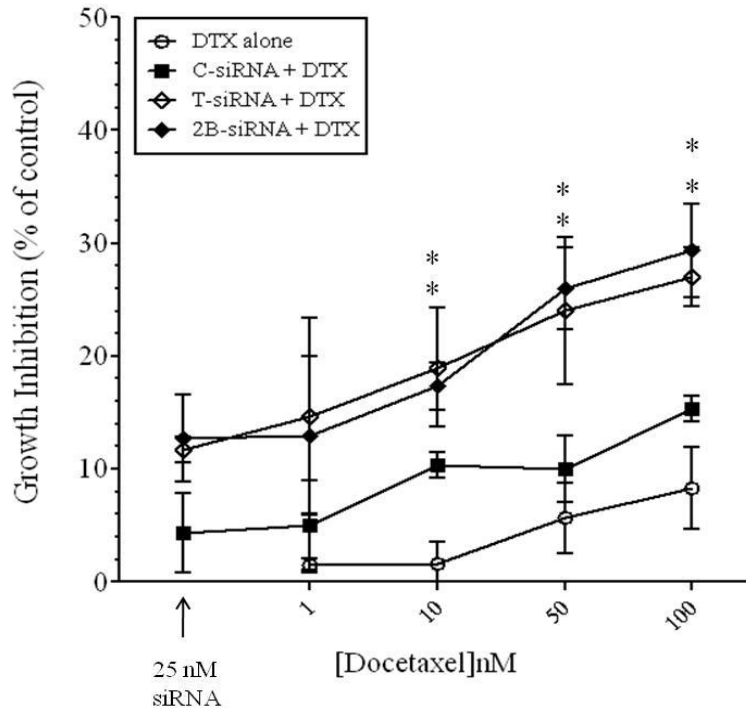

Target sequence of the additional survivin siRNAs

Total survivin: 5'-GCATCTCTACATTCAAGAA-3'

Survivin 2B: 5'-CCTGTAATACCAGCACTTT-3' (22)

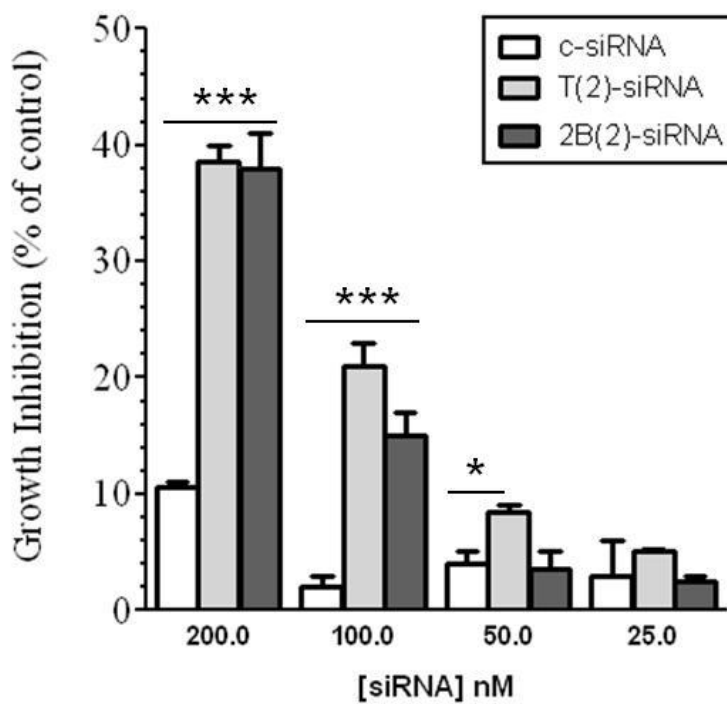

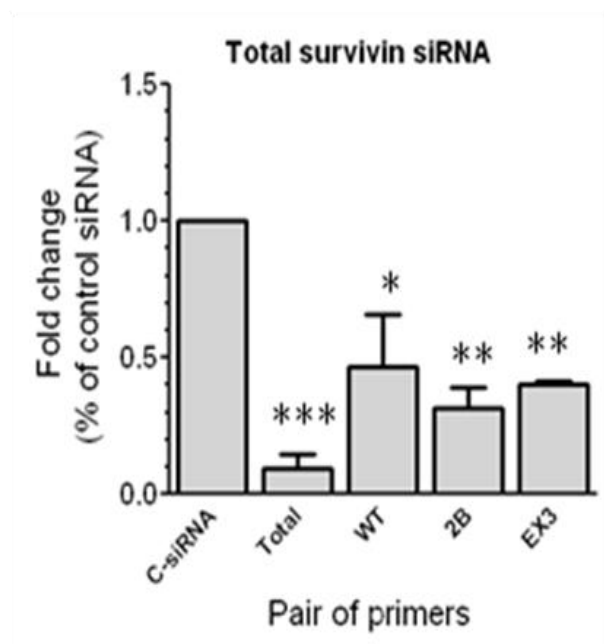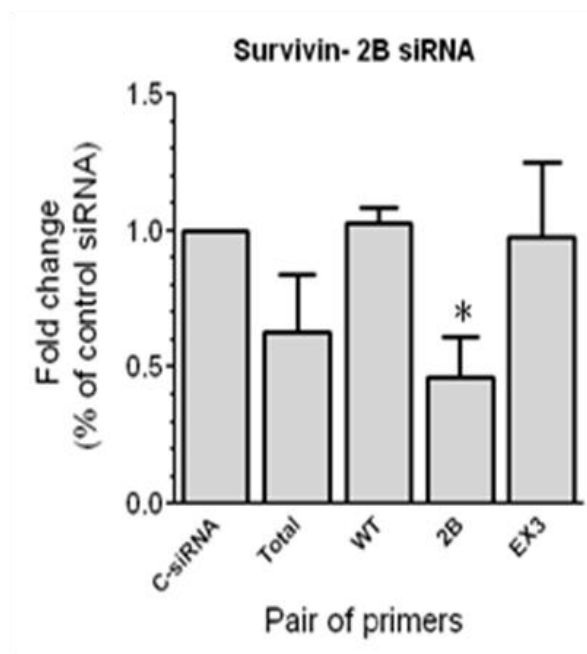

Supplement: NIHMS289624-supplement-1.pdf [file NIHMS289624-supplement-1.pdf]
